# Supplementary material for: A Pilot Randomized Trial to Compare Polyuria and Polydipsia during a Short Course of Prednisolone or Methylprednisolone in Dogs with Atopic Dermatitis
Source: Vet Sci. 2022 Sep 9;9(9):490. doi: 10.3390/vetsci9090490 (PMC9506298; doi:10.3390/vetsci9090490)
Supplement: Supplementary file 1 [file vetsci-09-00490-s001.zip › vetsci-1896214-supplementary.pdf]

## Supplementary Material

Figure S1: CONSORT Flow Diagram

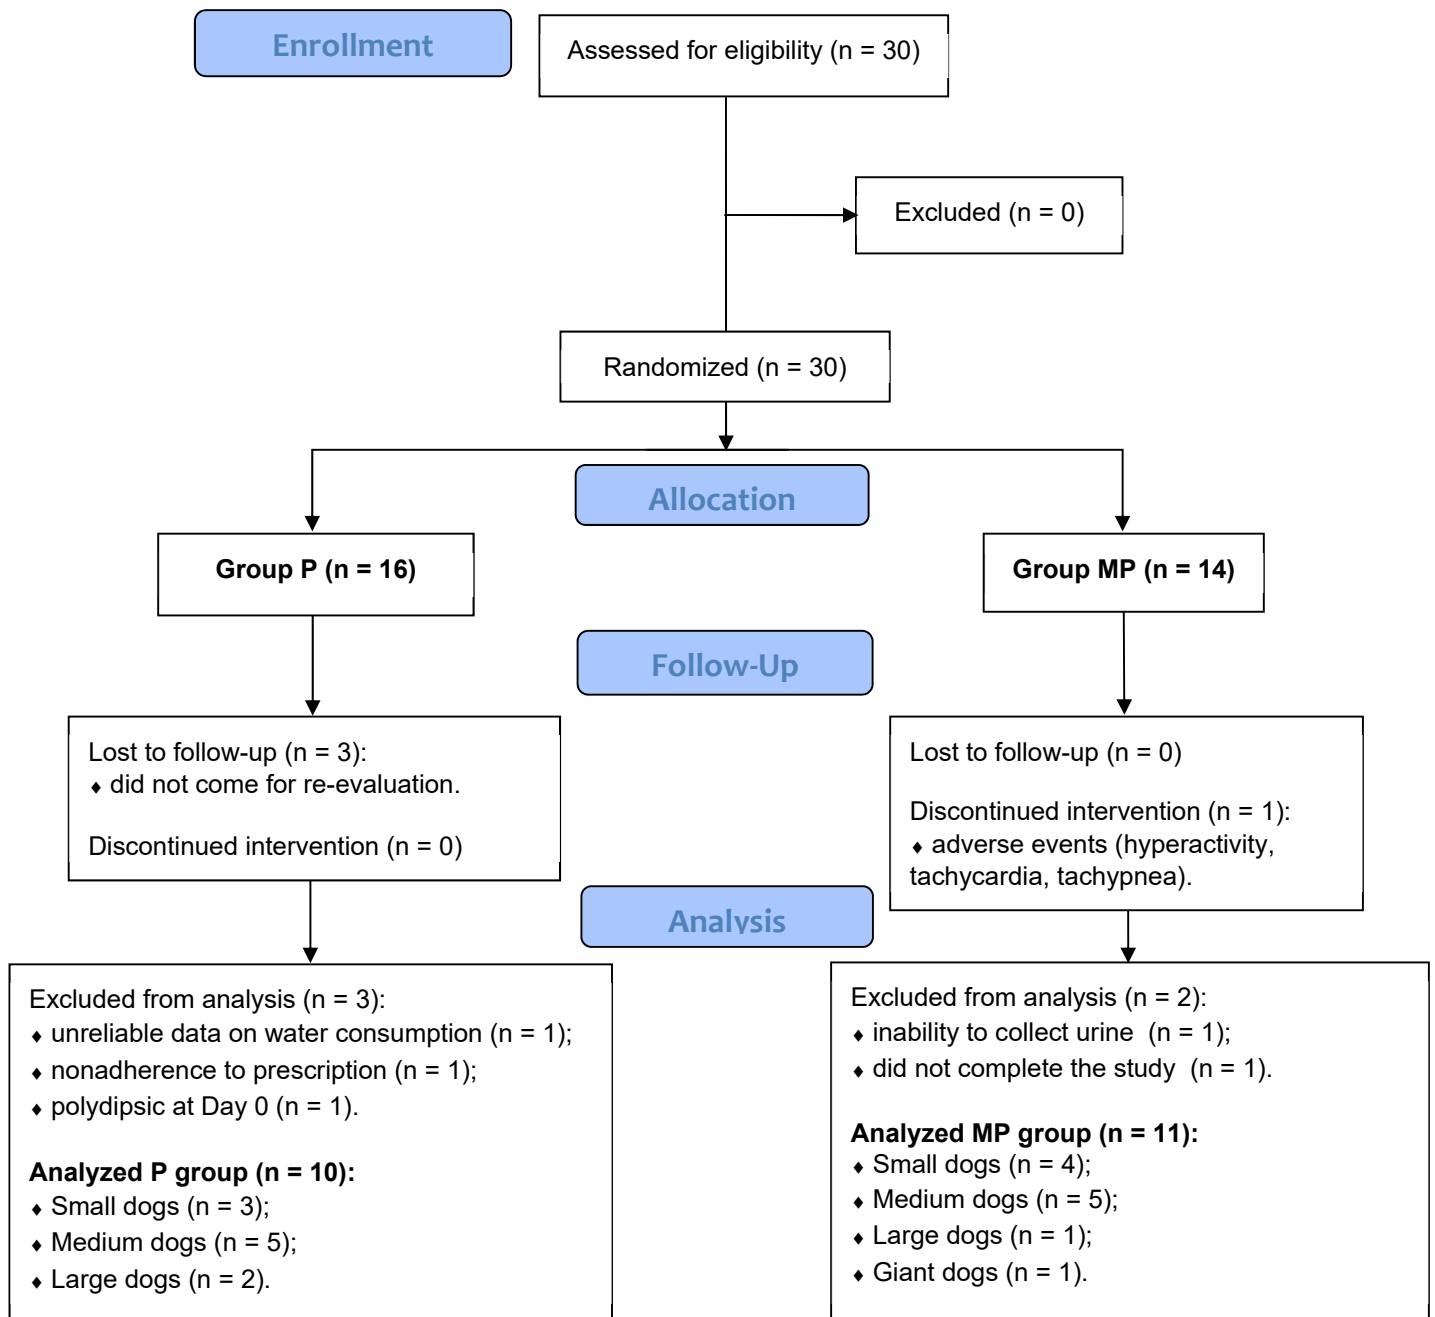

**Table S1: Patient Characteristics at Baseline**

**Prednisolone (P) group: signalment and weights of the dogs at baseline**

| Dog            | Breed           | Age (Y) | Weight (Kg) | Sex |
|----------------|-----------------|---------|-------------|-----|
| P1             | crossbred       | 2.7     | 9.9         | FI  |
| P2             | crossbred       | 2.2     | 16.6        | FI  |
| P3             | crossbred       | 5.3     | 2.5         | MC  |
| P4             | cockapoo        | 2       | 9.3         | FS  |
| P5             | French bulldog  | 4.6     | 14.3        | MI  |
| P6             | Akita inu       | 1.2     | 33.4        | MI  |
| P7             | dachshund       | 6.5     | 11.5        | MI  |
| P8             | crossbred       | 2       | 16.1        | MI  |
| P9             | giant schnauzer | 2.8     | 37.5        | FI  |
| P10            | French bulldog  | 3.5     | 14.5        | MI  |
| <i>Minimum</i> |                 | 1.2     | 2.5         |     |
| <i>Maximum</i> |                 | 6.5     | 37.5        |     |
| <i>Median</i>  |                 | 2.8     | 14.4        |     |
| <i>Mean</i>    |                 | 3.3     | 16.6        |     |

### Methylprednisolone (MP) group

| Dog  | Breed                   | Age (Y) | Weight (Kg) | Sex |
|------|-------------------------|---------|-------------|-----|
| MP1  | miniature schnauzer     | 2.1     | 6.8         | FI  |
| MP2  | crossbred               | 2.8     | 9           | FS  |
| MP3  | French bulldog          | 2.7     | 12.7        | FI  |
| MP4  | Akita inu               | 1.6     | 22.9        | FI  |
| MP5  | crossbred               | 2.9     | 19.6        | FS  |
| MP6  | doberman pinscher       | 3.9     | 46.8        | MI  |
| MP7  | American cocker spaniel | 1.1     | 8.6         | FI  |
| MP8  | Chinese shar Pei        | 3.9     | 22          | FI  |
| MP9  | French bulldog          | 1.8     | 9.5         | MI  |
| MP10 | golden retriever        | 1.1     | 39          | MI  |
| MP11 | crossbred               | 2.1     | 11.5        | FS  |
|      | <i>Minimum</i>          | 1.1     | 6.8         |     |
|      | <i>Maximum</i>          | 3.9     | 46.8        |     |
|      | <i>Median</i>           | 2.1     | 12.7        |     |
|      | <i>Mean</i>             | 2.4     | 18.9        |     |

Abbreviations: FI: female, intact; FS: female, spayed; MC: male, castrated; MI: male, intact; MP: methylprednisolone; P: prednisolone
